# Supplementary material for: Rifaximin Use, Adherence and Persistence in Patients with Hepatic Encephalopathy: A Real-World Study in the South of Italy
Source: MDPI journal article supplement (doi:10.3390/jcm12134515), 2023-07-06
Supplement: s1 [file s1]

**Table S1.** Baseline demographic and clinical characteristics of incident rifaximin users (Cohort 2), stratified by adherence.

|                                                  | <b>Adherents<br/>(PDC <math>\geq</math> 80%)<br/>N=354</b> |          | <b>Non-adherents<br/>(PDC &lt; 80%)<br/>N=296</b> |          | <b>P-value</b> |
|--------------------------------------------------|------------------------------------------------------------|----------|---------------------------------------------------|----------|----------------|
|                                                  | <b>n</b>                                                   | <b>%</b> | <b>n</b>                                          | <b>%</b> |                |
| <b>Gender</b>                                    |                                                            |          |                                                   |          |                |
| Male                                             | 228                                                        | 64.4     | 183                                               | 61.8     | 0.496          |
| Female                                           | 126                                                        | 35.6     | 113                                               | 38.2     |                |
| <b>Age (years)</b>                               |                                                            |          |                                                   |          |                |
| <65                                              | 110                                                        | 31.1     | 125                                               | 42.2     | 0.004          |
| 65-74                                            | 138                                                        | 39.0     | 83                                                | 28.0     |                |
| $\geq$ 75                                        | 106                                                        | 29.9     | 88                                                | 29.7     |                |
| <b>Cirrhosis complication</b>                    |                                                            |          |                                                   |          |                |
| Ascites                                          | 123                                                        | 34.7     | 100                                               | 33.8     | 0.797          |
| Varices                                          | 116                                                        | 32.8     | 83                                                | 28.0     | 0.193          |
| Portal hypertension                              | 61                                                         | 17.2     | 67                                                | 22.6     | 0.084          |
| Hepatocellular carcinoma                         | 57                                                         | 16.1     | 42                                                | 14.2     | 0.499          |
| Other*                                           | 16                                                         | 4.5      | 24                                                | 8.1      | 0.058          |
| <b>Extra hepatic<br/>comorbidities</b>           |                                                            |          |                                                   |          |                |
| Diabetes                                         | 107                                                        | 30.2     | 78                                                | 26.4     | 0.276          |
| Cardiovascular disease                           | 90                                                         | 25.4     | 48                                                | 16.2     | 0.004          |
| Cerebrovascular disease                          | 55                                                         | 15.5     | 38                                                | 12.8     | 0.328          |
| Chronic Kidney Disease                           | 46                                                         | 13.0     | 39                                                | 13.2     | 0.946          |
| Cancer                                           | 39                                                         | 11.0     | 37                                                | 12.5     | 0.558          |
| Psychiatric conditions                           | 5                                                          | 1.4      | 8                                                 | 2.7      | 0.250          |
| <b>Number of extra hepatic<br/>comorbidities</b> |                                                            |          |                                                   |          |                |
| 0                                                | 167                                                        | 47.2     | 163                                               | 55.1     | 0.116          |
| 1                                                | 79                                                         | 22.3     | 59                                                | 19.9     |                |
| $\geq$ 2                                         | 108                                                        | 30.5     | 74                                                | 25.0     |                |

\* Including jaundice, peritonitis and hepatorenal syndrome.

**Table S2.** Baseline demographic and clinical characteristics of incident rifaximin users (Cohort 2), stratified by persistence.

|                                              | Persistent<br>N=271 |      | Non-persistent<br>N=379 |      | P-value |
|----------------------------------------------|---------------------|------|-------------------------|------|---------|
|                                              | n                   | %    | n                       | %    |         |
| <b>Gender</b>                                |                     |      |                         |      |         |
| Male                                         | 172                 | 63.5 | 239                     | 63.1 | 0.915   |
| Female                                       | 99                  | 36.5 | 140                     | 36.9 |         |
| <b>Age (years)</b>                           |                     |      |                         |      |         |
| <65                                          | 74                  | 27.3 | 161                     | 42.5 | <0.001  |
| 65-74                                        | 110                 | 40.6 | 111                     | 29.3 |         |
| ≥75                                          | 87                  | 32.1 | 107                     | 28.2 |         |
| <b>Cirrhosis complication</b>                |                     |      |                         |      |         |
| Ascites                                      | 106                 | 39.1 | 117                     | 30.9 | 0.029   |
| Varices                                      | 85                  | 31.4 | 114                     | 30.1 | 0.726   |
| Portal hypertension                          | 46                  | 17.0 | 82                      | 21.6 | 0.141   |
| Hepatocellular carcinoma                     | 48                  | 17.7 | 51                      | 13.5 | 0.137   |
| Other*                                       | 15                  | 5.5  | 25                      | 6.6  | 0.579   |
| <b>Extra hepatic comorbidities</b>           |                     |      |                         |      |         |
| Diabetes                                     | 88                  | 32.5 | 97                      | 25.6 | 0.055   |
| Cardiovascular disease                       | 66                  | 24.4 | 72                      | 19.0 | 0.100   |
| Cerebrovascular disease                      | 41                  | 15.1 | 52                      | 13.7 | 0.613   |
| Chronic Kidney Disease                       | 38                  | 14.0 | 47                      | 12.4 | 0.546   |
| Cancer                                       | 33                  | 12.2 | 43                      | 11.3 | 0.745   |
| Psychiatric conditions                       | 4                   | 1.5  | 9                       | 2.4  | 0.420   |
| <b>Number of extra hepatic comorbidities</b> |                     |      |                         |      |         |
| 0                                            | 128                 | 47.2 | 202                     | 53.3 | 0.115   |
| 1                                            | 57                  | 21.0 | 81                      | 21.4 |         |
| ≥2                                           | 86                  | 31.8 | 96                      | 25.3 |         |

\* Including jaundice, peritonitis and hepatorenal syndrome.

**Table S3.** Mortality and hospital admission for the study cohort 1 during 1 year of follow-up.

|                                               | <b>Patients with HE-related<br/>hospital discharge<br/>N=544</b> |
|-----------------------------------------------|------------------------------------------------------------------|
| <b>Mortality at 1 year, n (%)</b>             | 287 (52.8)                                                       |
| <b>Hospitalizations for HE, n (%)</b>         | 170 (31.2)                                                       |
| <b>Hospitalizations for any cause, n (%)*</b> | 321 (59.0)                                                       |
| <b>Time to hospitalization*</b>               |                                                                  |
| Mean±SD                                       | 75±75                                                            |
| Percentiles, n                                |                                                                  |
| 25                                            | 21                                                               |
| 50                                            | 49                                                               |
| 75                                            | 103                                                              |

\* Patients re-admitted for any cause within a 1-year post-discharge.
